# Supplementary material
Source: publisher figshare collection journal article supplement (https://tandf.figshare.com/articles/dataset/_/3753561)

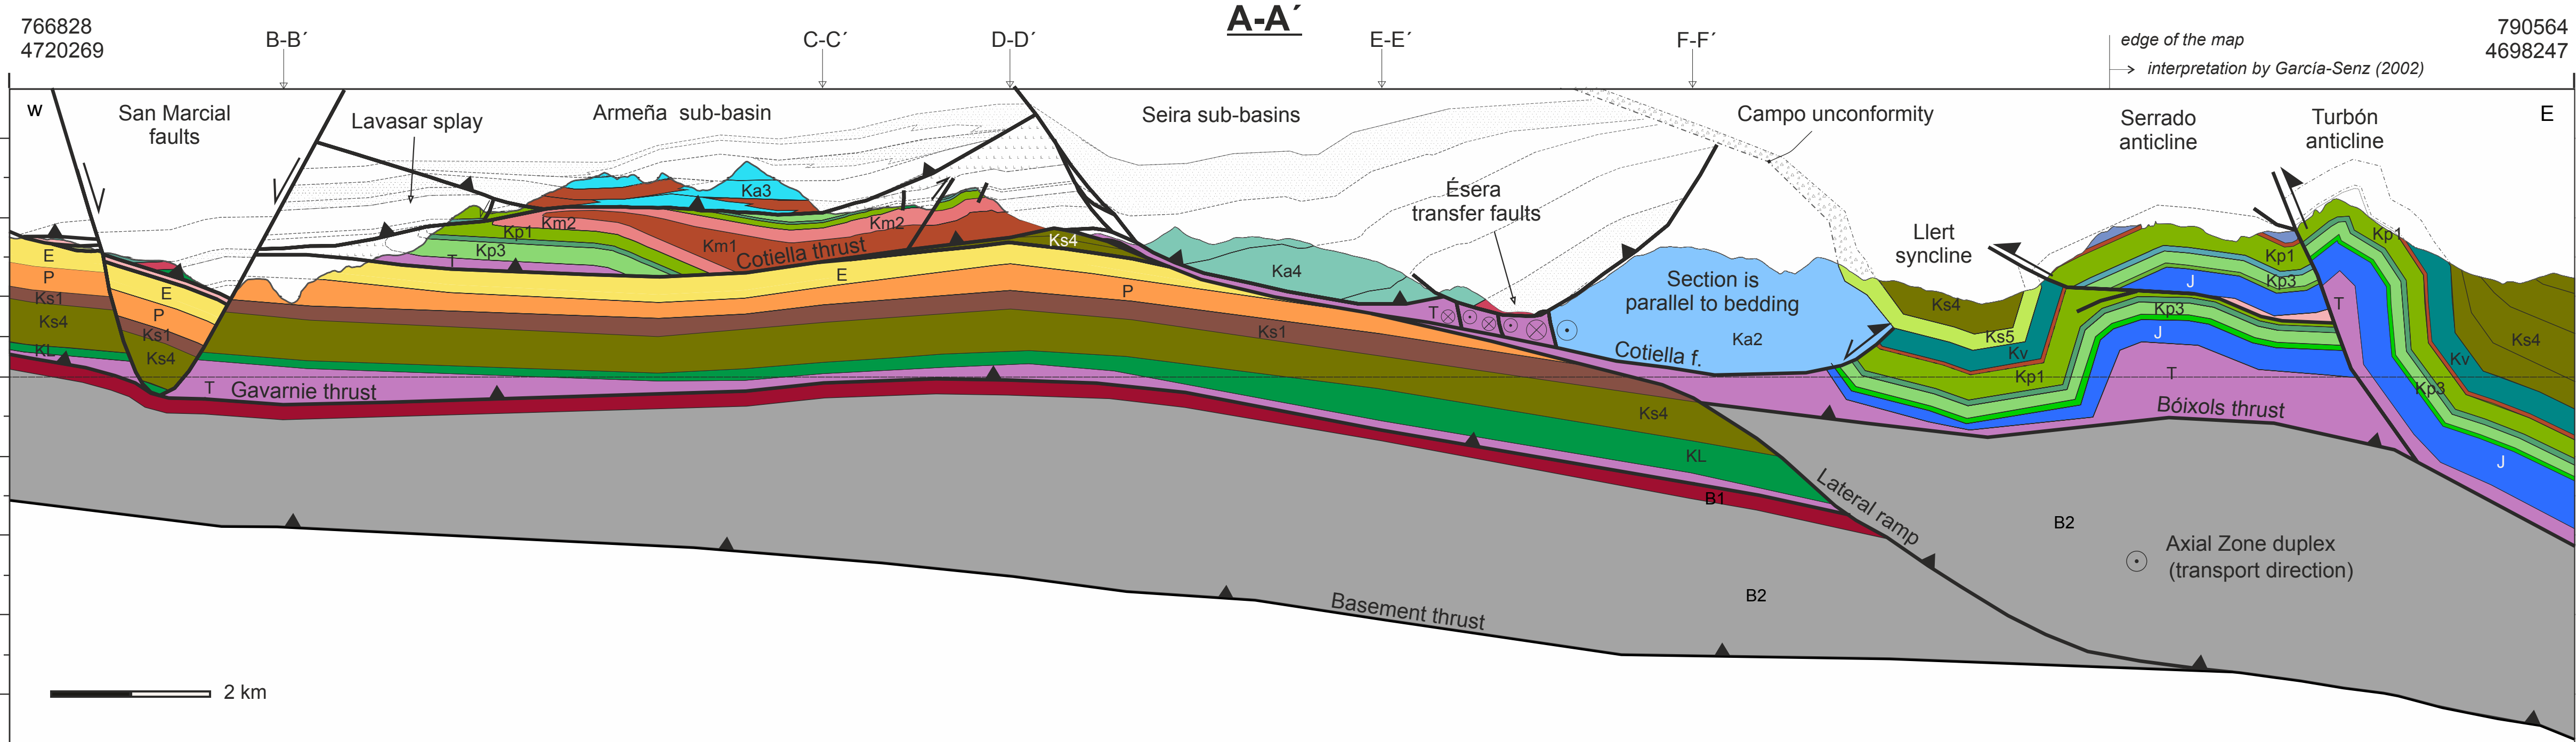

These cross-sections accompany the 1:25,000 map of Cotiella thrust sheet. A-A', B-B' and F-F' cross-sections extend beyond the boundaries of the map.

### Colour key

(indicating which units have been grouped in the cross-sections)

#### SYN-OROGENIC

##### Eocene

E Limestones, marine detritics and marls (undiff.)

##### Paleocene

P1 Sandy limestones with cross-bedding (undiff.)

P2 Massive grey limestones (undiff.)

##### Late Santonian - Maastrichtian

Ks1 Quartz-arenites and sandy limestones (Arenyí Fm)

Ks2 Turbidites and marls (Barbaruens Fm)

Ks3 Sandy limestones (undiff.)

Ks4 Turbidites and marls (Mascarell Mb)

Ks5 Heterolithic carbonate breccia (Campo Breccia Mb)

#### POST-RIFT (Cotiella Basin)

##### Syn-extensional salt tectonics

##### Middle Coniacian - early Santonian

Kv Massive limestones with Lacazina (Ventamillo Fm)

Kan Grey marls and marly limestones (Anserola Fm)

Ka1 Massive light grey limestones with rudists, Lacazina and chert nodules (Gallinés Ut)

Ka2 Micritic to granular dark grey limestones with sponge spicules, (Aguasalenz Ut)

Ka3 Marly limestones with flint nodules and sponge spicula (Armeña Ut)

Ka4 Limestones and marly limestones with some echinoderms, sponges, rudists and corall debris (Seira Ut)

Km1 Red-orange sandy grainstones with quartz gravel, bioclasts, rudists and cross-stratification (Maciños Ut)

Km2 Grey sandy grainstones with quartz gravel (Angón Ut)

##### Pre-extensional salt tectonics

##### Late Albian - early Coniacian

Kp1 Packstone with miliolids (Congost Fm)

Kp2 Limestones with Phitonella (Pardina Limestone)

Kp3 Limestones with Praeaeveolina (Santa Fe Limestone)

Kp4 Quartz-arenites and limestones with Orbitolina (Turbón Sandstone)

#### SYN-RIFT

##### Early Cretaceous

Ke Limestones (undiff.)

#### PRE-RIFT

##### Jurassic

J Dolomites and limestones

##### Main detachment

##### Middle - Late Triassic

T1 Gypsiferous shales with gypsum (Keuper facies)

T2 Dolerites (Keuper facies)

T3 Limestones (Muschelchalk facies)

##### Basement

##### Paleozoic - Early Triassic

B1 Permian - Early Triassic red beds (Buntsandstein facies)

B2 Paleozoic metasedimentary rocks

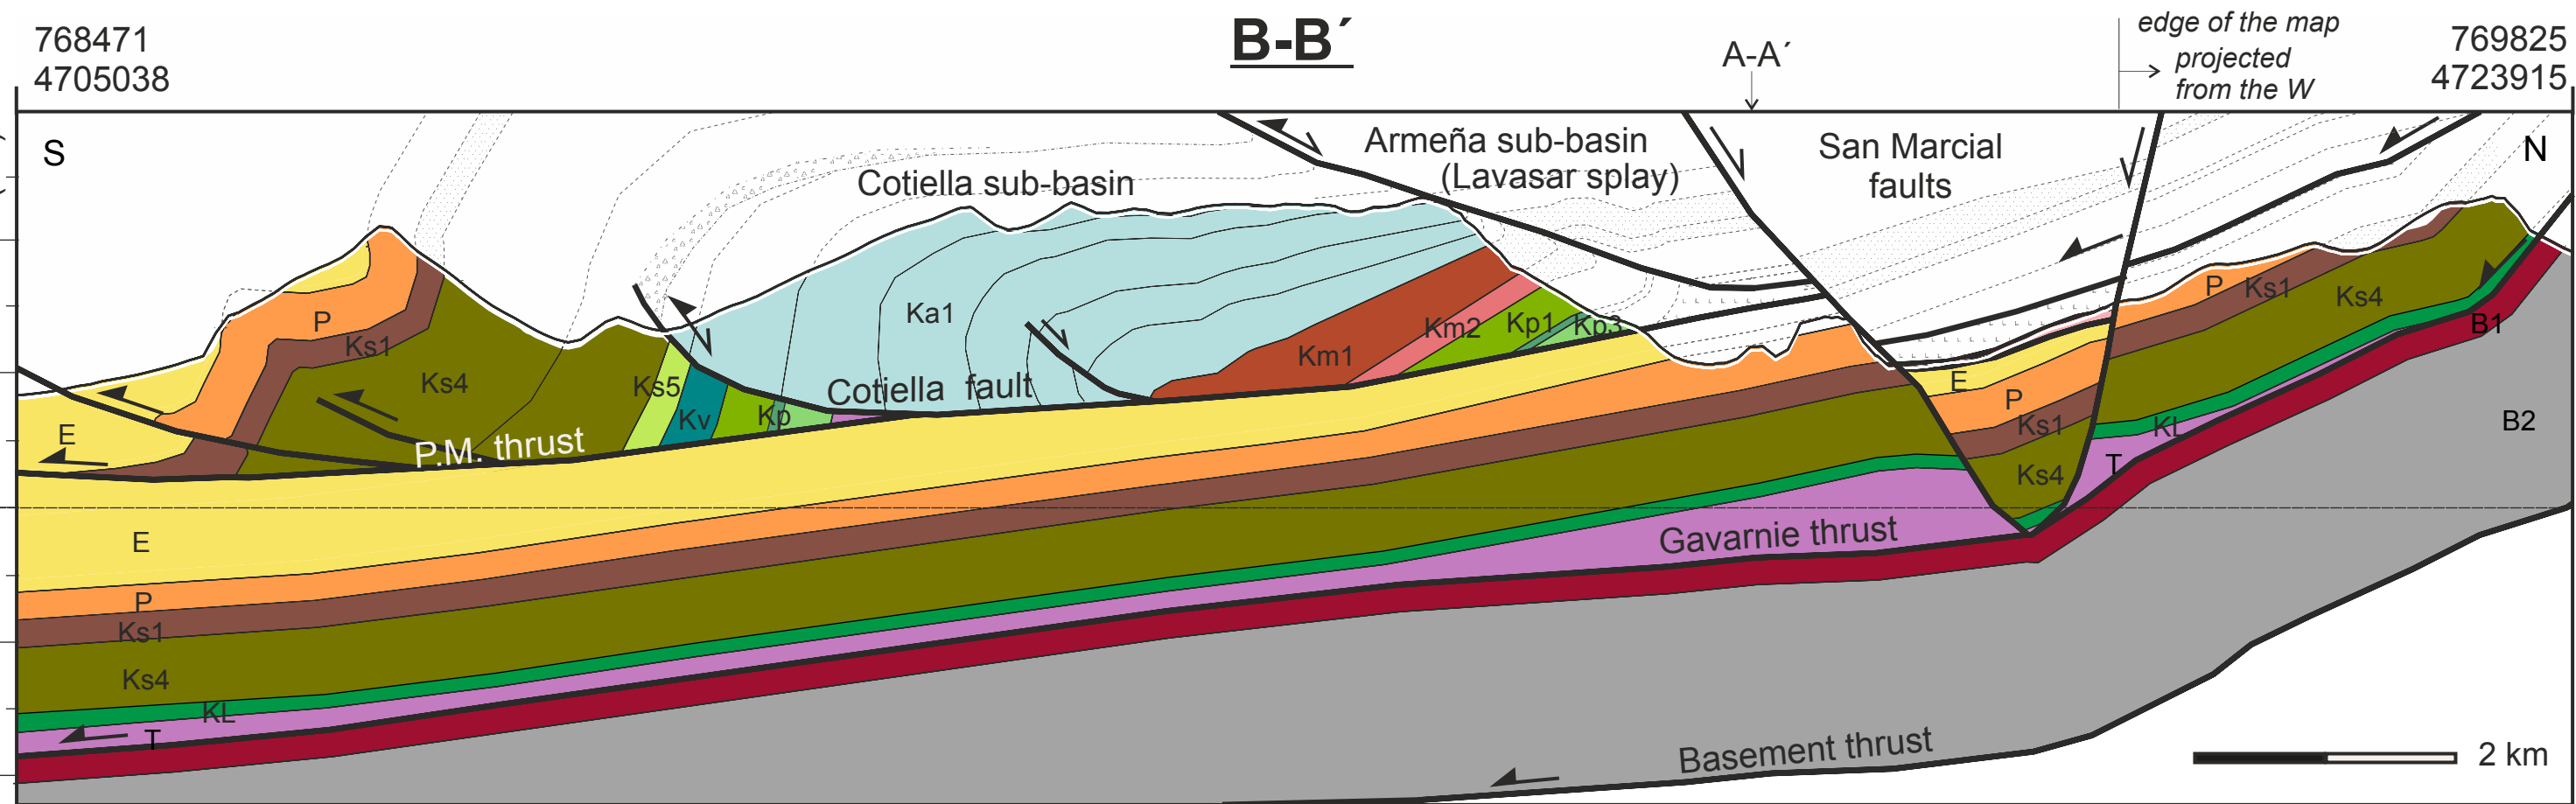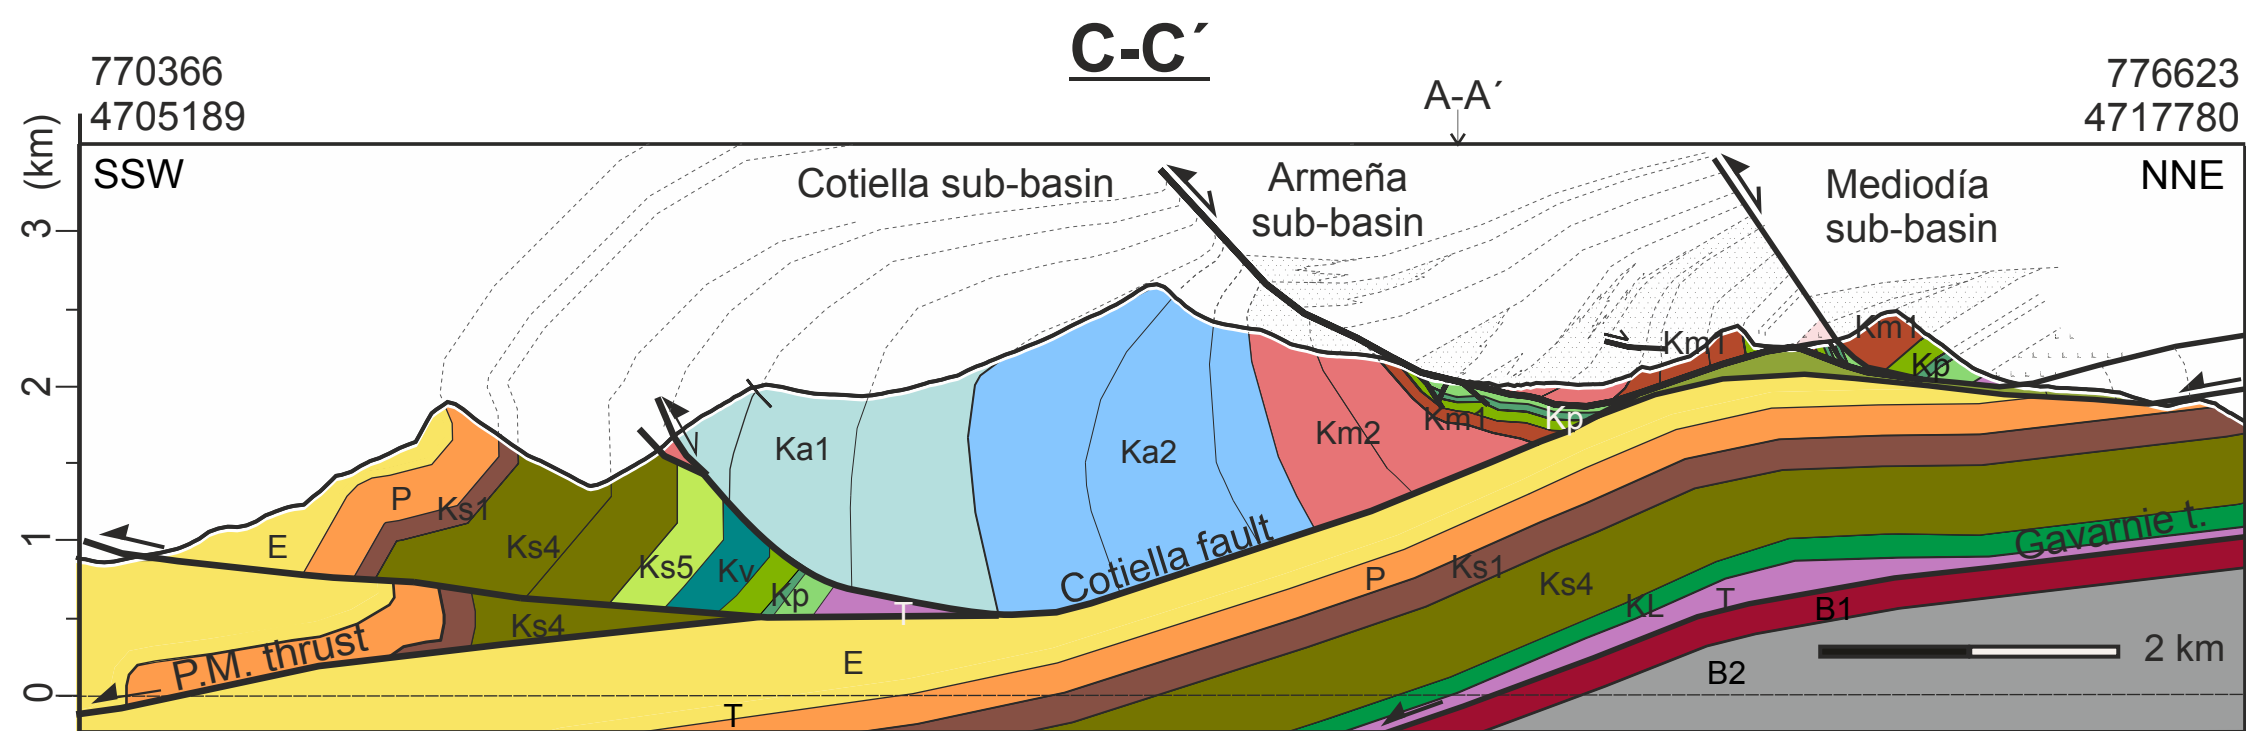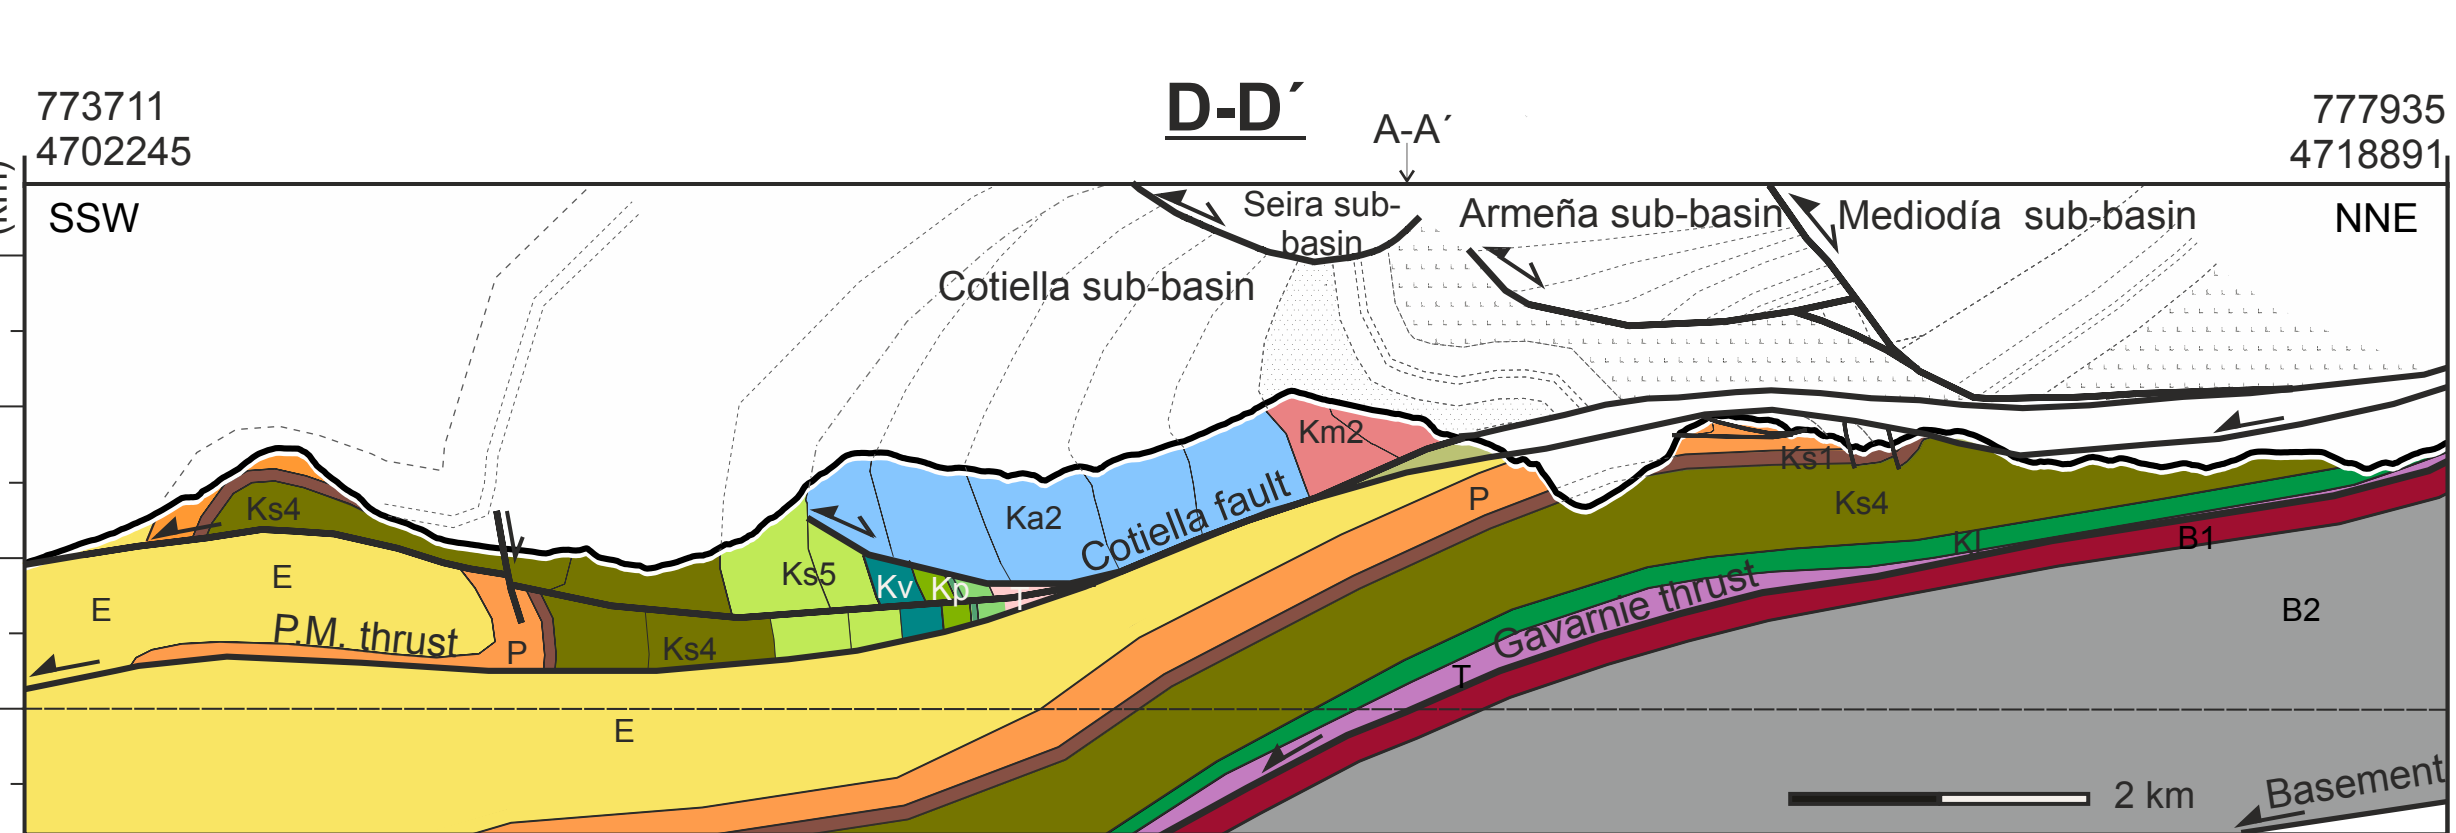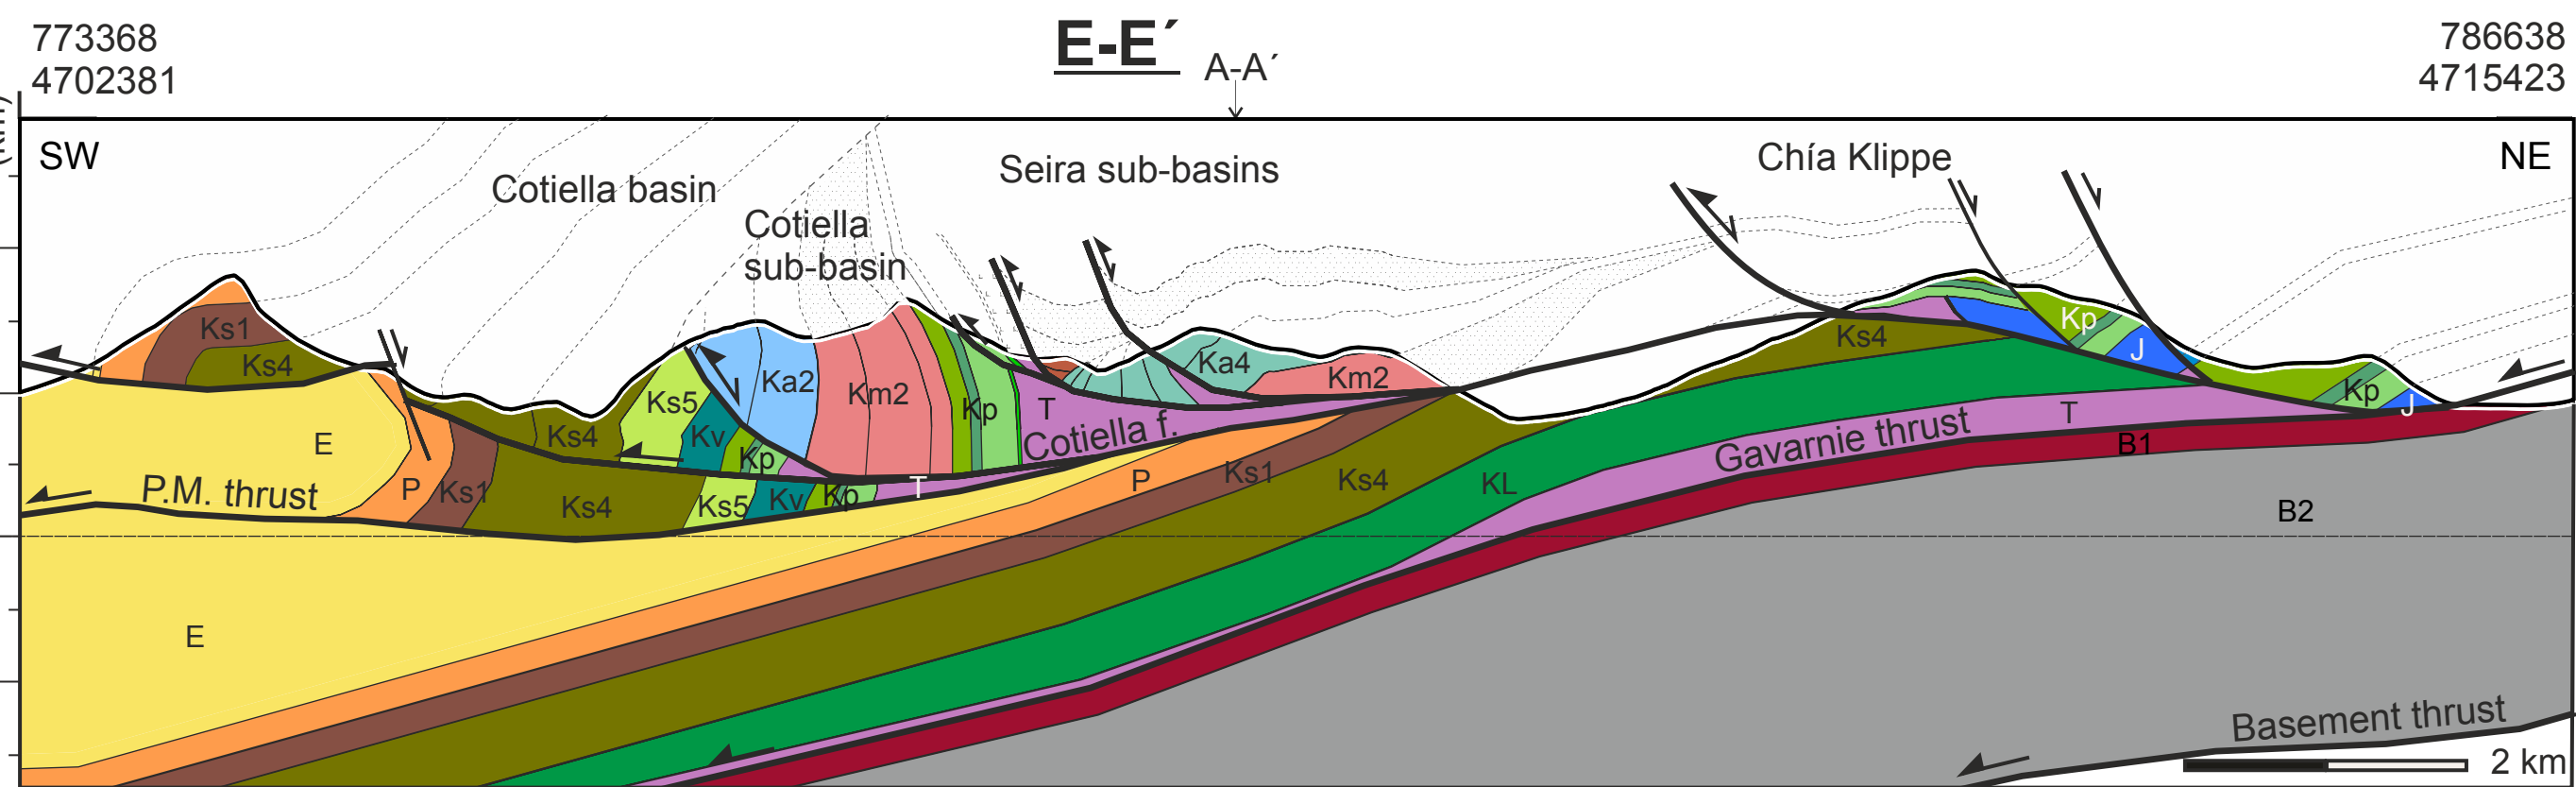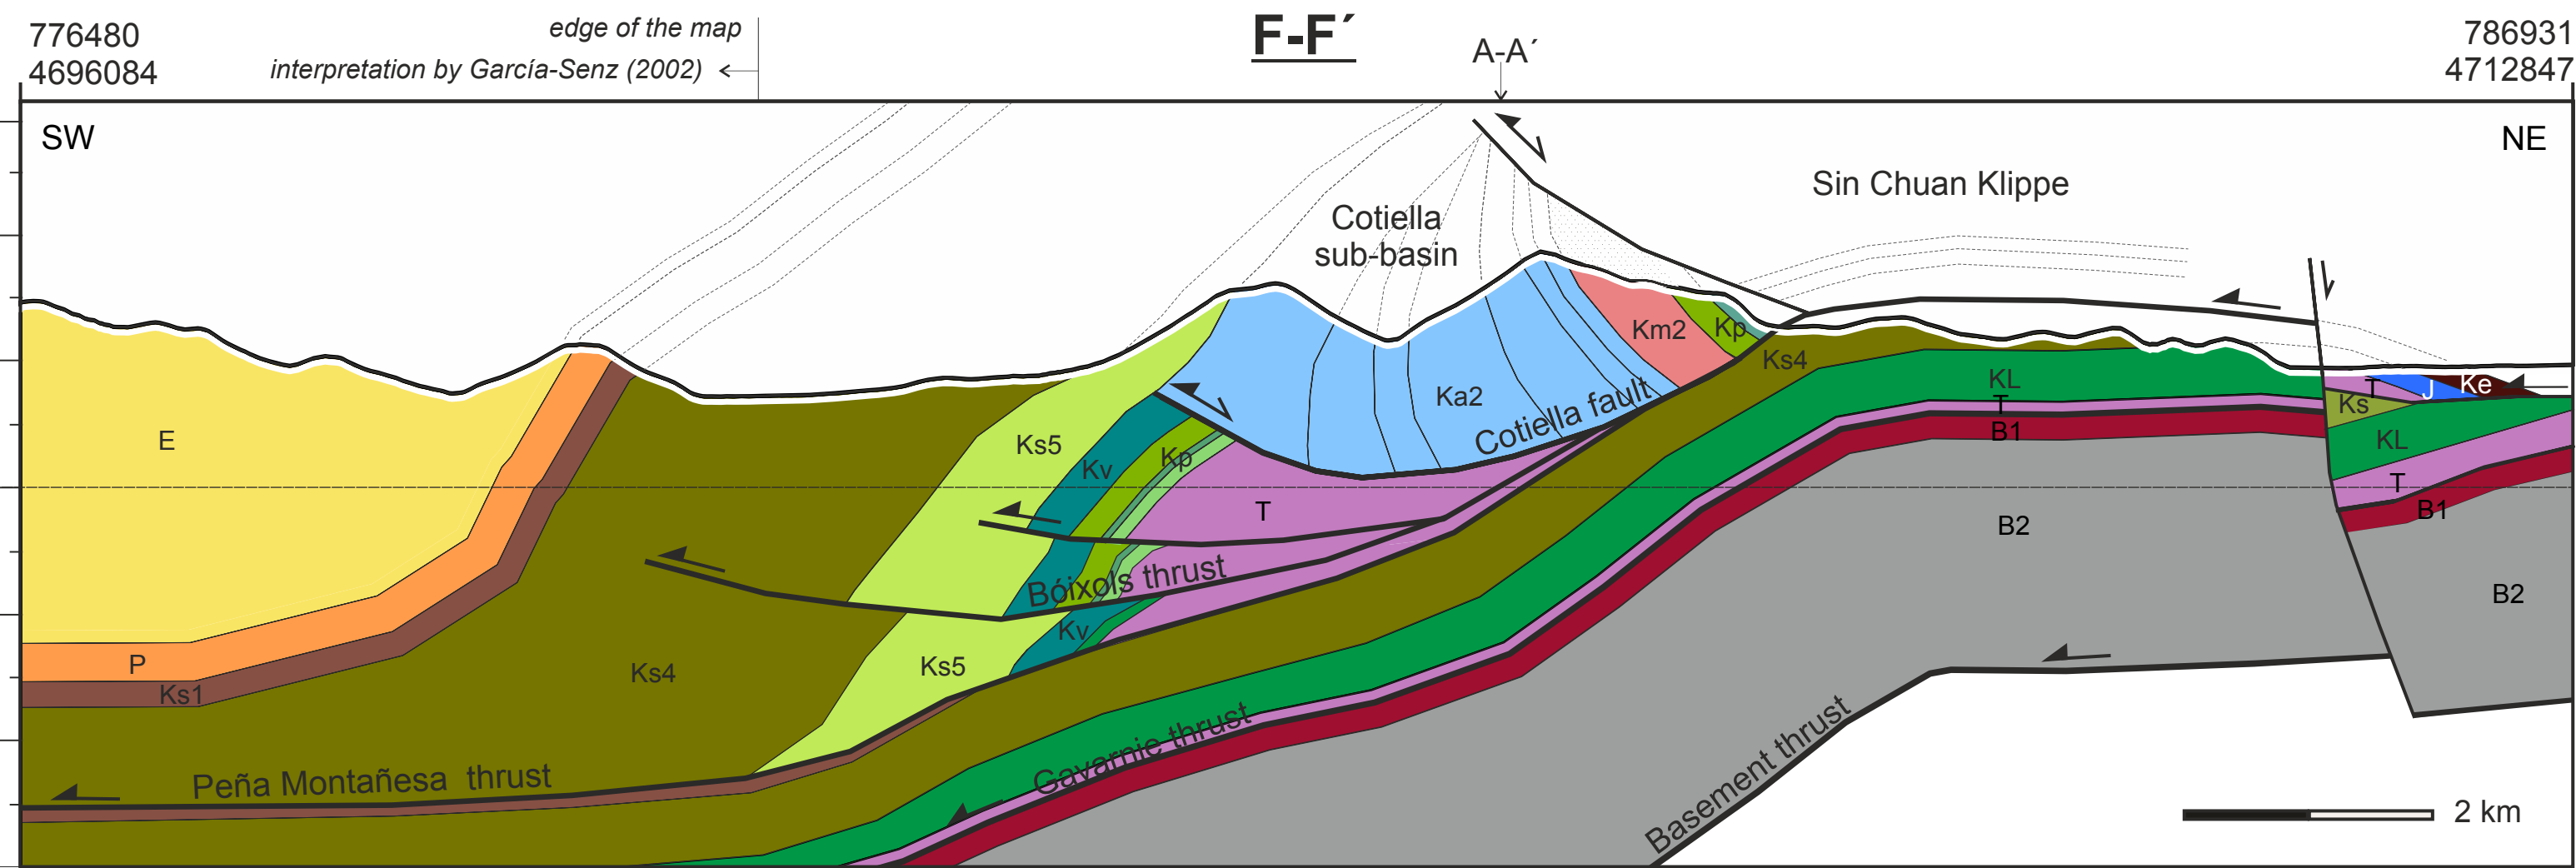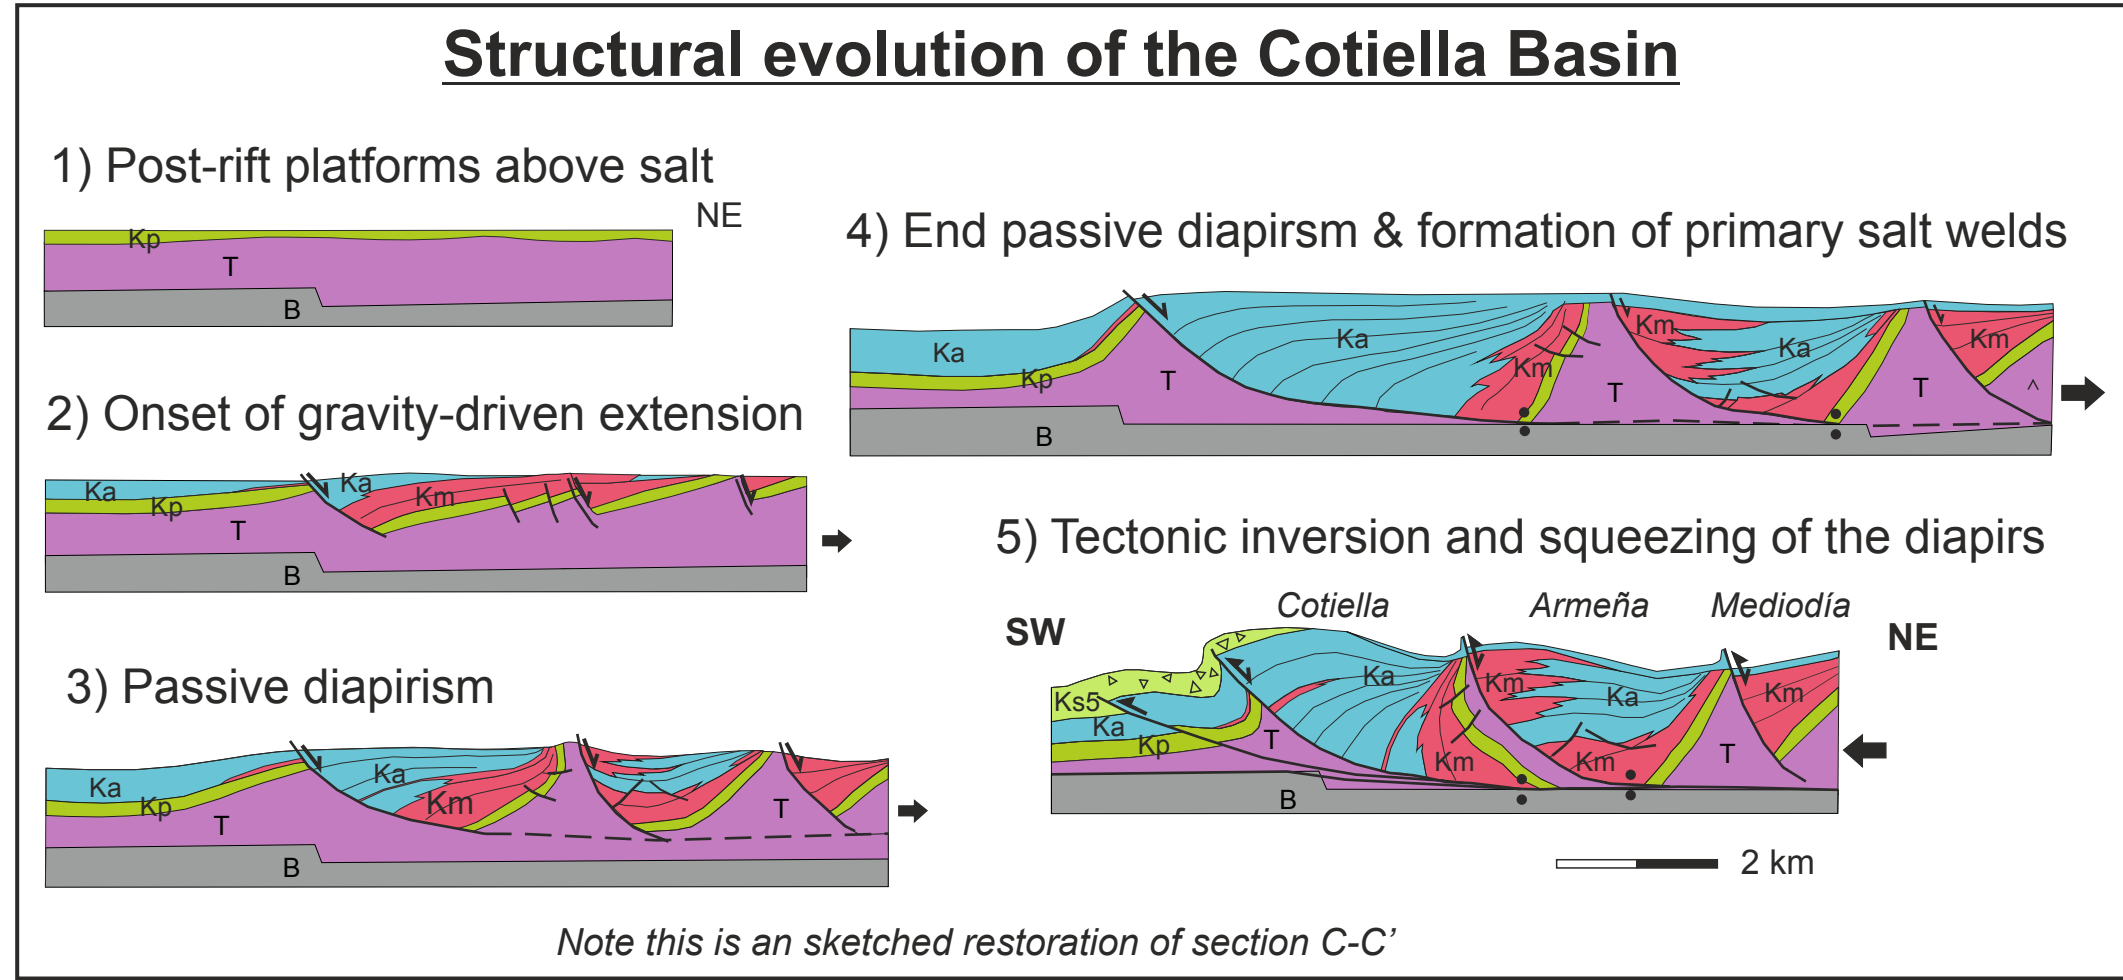

Supplement: Supplementary file 1 [file 1]
